# Supplementary material
Source: Springer Nature journal article supplement (https://www.springermedizin.de/resource/supplementary/12873_2011_143_MOESM1_ESM.pdf/9431540)
Supplement: MOESM1 [file 9431540]

### Additional File 1: Sample size calculation for study.

Sample size was estimated using power-based sample size calculations. To detect a 10% difference ( $\delta$ ) between the calculated APLS formula, the Luscombe and Owens formula and the measured weight, when  $\alpha$  is  $< 0.05$  and power is 80%, a sample size of 252 patients per year of age was needed.

Previous studies suggest that, when measuring weight differences as a percentage of actual weight of subjects, the standard deviation for the sample would fall between 20% and 40%. Therefore, in the formula below,  $s$  (the standard deviation of the sample) was estimated at 30%.

The formula used for estimating sample size was:

$$n = f(\alpha, \beta) \cdot 2s^2 / (\delta)^2$$

Where:

- $\alpha$  = is the significance level
- $1 - \beta$  = is the power of your test.
- $f(\alpha, \beta)$  is a calculated function of  $\alpha$  and  $\beta$ .
- $s$  is the standard deviation (estimated from previous studies)

|          | $\beta$ |      |     |
|----------|---------|------|-----|
| $\alpha$ | 0.1     | 0.2  | 0.5 |
| 0.05     | 10.5    | 7.9  | 3.8 |
| 0.01     | 14.9    | 11.7 | 6.6 |

Table: calculated values of  $f(\alpha, \beta)$  for different set values of  $\alpha$  and  $\beta$ .

References:

1. Statistics: An Introduction to Sample Size Calculations Rosie Cornish. 2006. Mathematics Learning Support Centre (accessed at <http://mlsc.lboro.ac.uk/resources/statistics/Samplesize.pdf>)
